# Supplementary material
Source: Springer Nature journal article supplement (https://www.springermedizin.de/resource/supplementary/12916_2011_438_MOESM3_ESM.pdf/9599962)
Supplement: MOESM3 [file 9599962]

| Level of evidence | Study design                                                                                                                                                                                                                            |
|-------------------|-----------------------------------------------------------------------------------------------------------------------------------------------------------------------------------------------------------------------------------------|
| I                 | Evidence obtained from a systematic review of all relevant randomised controlled trials                                                                                                                                                 |
| II                | Evidence obtained from at least one properly-designed randomised controlled trial                                                                                                                                                       |
| III-1             | Evidence obtained from well-designed pseudorandomised controlled trials (alternate allocation or some other method)                                                                                                                     |
| III-2             | Evidence obtained from comparative studies (including systematic reviews of such studies) with concurrent controls and allocation not randomised, cohort studies, case-control studies, or interrupted time series with a control group |
| III-3             | Evidence obtained from comparative studies with historical control, two or more single arm studies, or interrupted time series without a parallel control group                                                                         |
| IV                | Evidence obtained from case series, either post-test or pre-test/post-test                                                                                                                                                              |
